# Supplementary material for: Modelling Co-Infection with Malaria and Lymphatic Filariasis
Source: PLoS Comput Biol. 2013 Jun 13;9(6):e1003096. doi: 10.1371/journal.pcbi.1003096 (PMC3681634; doi:10.1371/journal.pcbi.1003096)
Supplement: Text S3 — Derivation of the basic reproduction number of LF in the presence of malaria. (DOCX) [file pcbi.1003096.s004.docx]

**Text S3:** **Derivation of the Basic Reproduction Number of LF in the Presence of Malaria**

Following an identical procedure to Supporting Information S2 by considering equations (1) – (14) in the main text, we first derive the matrix of new infections where the elements () for

and the functions are given by , , , , , , , , , , , , , (with ). We can similarly calculate elements of the matrix as where , , , , , , , , , , , , , .

Substitituting , evaluating the matrices at the LF-free equilibrium and forming the next-generation matrix allows the dominant eigenvalue (and hence ) to be calculated. Note also that the value of that emerges from the next-generation approach needs to be raised to the power of three in order to be consistent with the standard definition of the basic reproduction number.
